# Supplementary material
Source: PubMed Central journal article supplement (PMC7237781)
Supplement: AEM.00240-20-s0001.pdf [file AEM.00240-20-s0001.pdf]

961

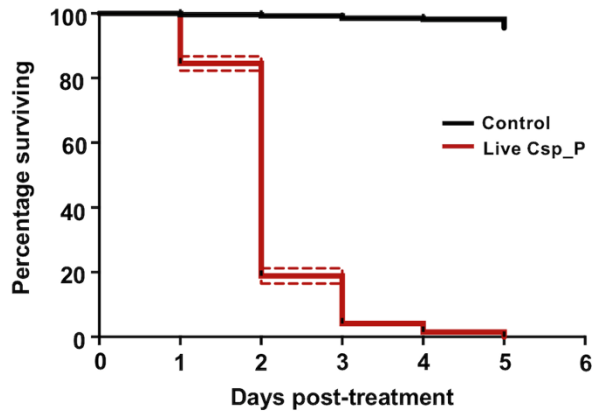

962

963

964

**Fig. S1: Live *Chromobacterium Csp\_P* effectively kills *Ae. aegypti* ROCK larvae when provided in**

965 **a pellet.** Groups of 30 L<sub>2</sub> larvae were provided either a control (black line) or live Csp\_P (red line) pellet in

966 300mL of deionized water. Pellets contained fishmeal as an attractant, and 20% gelatin as a stabilizing

967 agent. Pellets containing live Csp\_P induced a significantly higher rate of mortality than no bacteria

968 control pellets (Cox Regression:  $P < 0.0001$ ). Lines depict the percentage of larvae surviving at each day

969 post-treatment ( $\pm$  s.e.m.) for four experimental replicates, with each containing three cages per treatment.

970

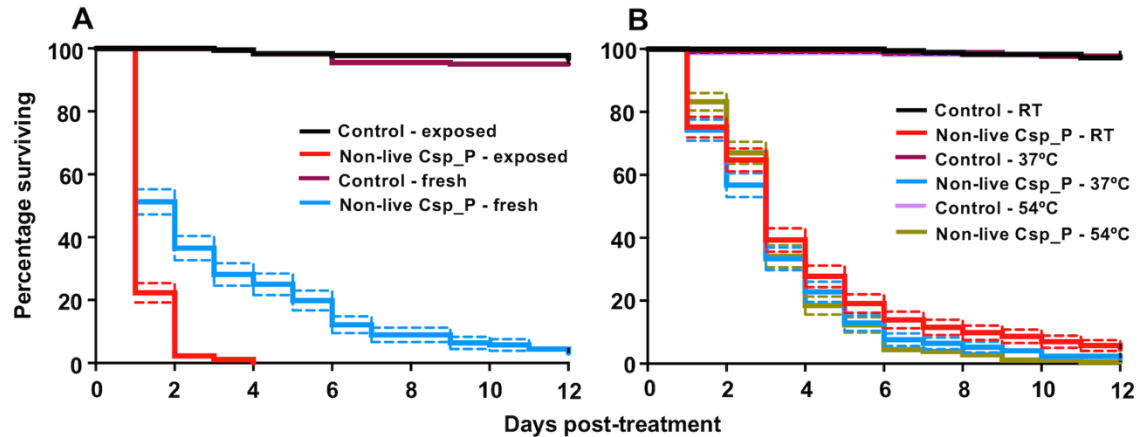

971  
972  
973

**Fig. S2: Non-live Csp\_P agar pellets have lengthy residual activity, and are heat stable.** We

974 developed a revised non-live Csp\_P pellet formulation, substituting 1.5% agar for 20% gelatin to improve  
975 pellet stability in water. We examined the efficacy of these pellets against *Ae. aegypti* ROCK larvae where  
976 pellets were either freshly prepared and fed to larvae (fresh), or left sitting in a mosquito breeder and  
977 300mL of water for 2 weeks before larvae were introduced (exposed) (**A**). We observed that larvae in the  
978 exposed Csp\_P agar treatment experienced more rapid death, than those in the fresh Csp\_P agar  
979 treatments (Cox Regression:  $P < 0.0001$ ). We then heat-treated whole Csp\_P and control agar pellets at  
980 room temperature, 37°C or 54°C for two weeks, and then fed them to larvae (**B**), where we observed that  
981 heat treatment had no effect on the larvicidal activity of the Csp\_P agar pellets (Cox Regression:  $P =$   
982 0.929). In all experiments, groups of 30 ROCK L<sub>2</sub> larvae were provided either a control or non-live Csp\_P  
983 agar pellet in 300mL of deionized water.

984

**Supplementary File 1 - Pellet attractiveness (Fishmeal Pellets)**

**Experiments assessing attractiveness of fishmeal pellets**

20% fishmeal

400mg in 2mL gelatin pellet with 1mL Csp\_P

Chambers

- 1 Attractant
- 2 Initial chamber
- 3 No bait

|   |   |   |
|---|---|---|
| 1 | 2 | 3 |
|---|---|---|

**Rep 1**

| Chamber | Time (mins) | 1 | 5  | 10 | 15 | 20 | 25 | 30 |
|---------|-------------|---|----|----|----|----|----|----|
| 1       | 1           | 3 | 10 | 11 | 14 | 16 | 17 | 19 |
| 2       | 2           | 8 | 3  | 1  | 2  | 2  | 1  | 1  |
| 3       | 3           | 9 | 7  | 8  | 4  | 2  | 2  | 0  |

**Rep 2**

| Chamber | Time (mins) | 1  | 5  | 10 | 15 | 20 | 25 | 30 |
|---------|-------------|----|----|----|----|----|----|----|
| 1       | 1           | 12 | 20 | 24 | 25 | 26 | 27 | 30 |
| 2       | 2           | 16 | 5  | 3  | 4  | 0  | 2  | 0  |
| 3       | 3           | 2  | 5  | 3  | 1  | 4  | 1  | 0  |

**Percentages at 30 mins**

|   | R1 | R2  | Average |
|---|----|-----|---------|
| 1 | 95 | 100 | 97.5    |
| 2 | 5  | 0   | 2.5     |
| 3 | 0  | 0   | 0       |

**Summary**

|                        |      |
|------------------------|------|
| Responded to bait      | 97.5 |
| Did not respond        | 2.5  |
| Moved to empty chamber | 0    |

**Supplementary File 1 - Pellet attractiveness (Fish food Pellets)**

**Experiments assessing attractiveness of fish food pellets**

20% fish food                      400mg in 2mL gelatin pellet with 1mL Csp\_P

|          |                   |   |   |   |
|----------|-------------------|---|---|---|
| Chambers | 1 Attractant      | 1 | 2 | 3 |
|          | 2 Initial chamber |   |   |   |
|          | 3 No bait         |   |   |   |

**Rep 1**

| Chamber | Time (mins) | 1  | 5  | 10 | 15 | 20 | 25 | 30 |
|---------|-------------|----|----|----|----|----|----|----|
| 1       |             | 2  | 11 | 13 | 13 | 13 | 11 | 10 |
| 2       |             | 11 | 3  | 2  | 2  | 2  | 1  | 2  |
| 3       |             | 7  | 6  | 5  | 5  | 7  | 8  | 8  |

**Rep 2**

| Chamber | Time (mins) | 1  | 5  | 10 | 15 | 20 | 25 | 30 |
|---------|-------------|----|----|----|----|----|----|----|
| 1       |             | 0  | 18 | 22 | 22 | 27 | 26 | 28 |
| 2       |             | 27 | 8  | 4  | 3  | 0  | 0  | 0  |
| 3       |             | 3  | 4  | 4  | 5  | 3  | 4  | 2  |

**Percentages at 30 mins**

|   | R1 | R2         | Average    |
|---|----|------------|------------|
| 1 | 50 | 93.3333333 | 71.6666667 |
| 2 | 10 | 0          | 5          |
| 3 | 40 | 6.6666667  | 23.3333333 |

| Summary                | 71.6666667 |
|------------------------|------------|
| Responded to bait      | 5          |
| Did not respond        | 23.3333333 |
| Moved to empty chamber | 0          |

**Supplementary File 1 - Pellet attractiveness (Comparison of attractiveness of Fishmeal and Fish food pellets)**

**Experiments comparing the attractiveness of Fishmeal to Fish Food**

Fish Food - ground powder of Tetramin tropical flakes

|          |                   |   |   |   |
|----------|-------------------|---|---|---|
| Chambers | 1 Fish Food       | 1 | 2 | 3 |
|          | 2 Initial chamber |   |   |   |
|          | 3 Fishmeal        |   |   |   |

**Rep 1**

| Chamber | Time (mins) | 1  | 5  | 10 | 15 | 20 | 25 | 30 |
|---------|-------------|----|----|----|----|----|----|----|
| 1       |             | 6  | 9  | 7  | 4  | 3  | 7  | 4  |
| 2       |             | 3  | 4  | 7  | 14 | 15 | 2  | 1  |
| 3       |             | 21 | 17 | 16 | 12 | 12 | 21 | 25 |

**Rep 2**

| Chamber | Time (mins) | 1  | 5  | 10 | 15 | 20 | 25 | 30 |
|---------|-------------|----|----|----|----|----|----|----|
| 1       |             | 7  | 6  | 10 | 9  | 4  | 5  | 4  |
| 2       |             | 6  | 4  | 1  | 3  | 8  | 4  | 3  |
| 3       |             | 17 | 20 | 19 | 18 | 18 | 21 | 23 |

**Percentages at 30 mins**

|   | R1         | R2         | Average    |
|---|------------|------------|------------|
| 1 | 13.3333333 | 13.3333333 | 13.3333333 |
| 2 | 3.3333333  | 10         | 6.6666667  |
| 3 | 83.3333333 | 76.6666667 | 80         |

|                        |            |
|------------------------|------------|
| Responded to Fish food | 13.3333333 |
| Did not respond        | 6.6666667  |
| Responded to Fishmeal  | 80         |

**Statistical comparison of attractiveness**

**Choice assay - Fishmeal vs Fishfood**

| Small boxes - Fishmeal vs Fishfood |    |    | Stats - Chi square test                 |                     |
|------------------------------------|----|----|-----------------------------------------|---------------------|
|                                    | FM | FF | Table Analyzed                          | Small box - FM v FF |
| Responded to bait (R)              |    | 49 | 38                                      |                     |
| Did not respond (D)                |    | 1  | 2                                       |                     |
| Moved to empty chambers (M)        |    | 0  | 10                                      |                     |
|                                    |    |    | Chi-square                              |                     |
|                                    |    |    | Chi-square, df                          | 11.72, 2            |
|                                    |    |    | <b>P value</b>                          | <b>0.0028</b>       |
|                                    |    |    | <b>P value summary</b>                  | <b>**</b>           |
|                                    |    |    | One- or two-tailed                      | NA                  |
|                                    |    |    | Statistically significant? (alpha<0.05) | Yes                 |
|                                    |    |    | Data analyzed                           |                     |
|                                    |    |    | Number of rows                          | 2                   |
|                                    |    |    | Number of columns                       | 3                   |
